# Supplementary material for: Label-free detection of Phytophthora ramorum using surface-enhanced Raman spectroscopy
Source: Royal Society of Chemistry journal article supplement (doi:10.1039/c5an01156f), 2015-01-01
Supplement: c5an01156f1.pdf [file c5an01156f1.pdf]

### Supplemental figure S1:

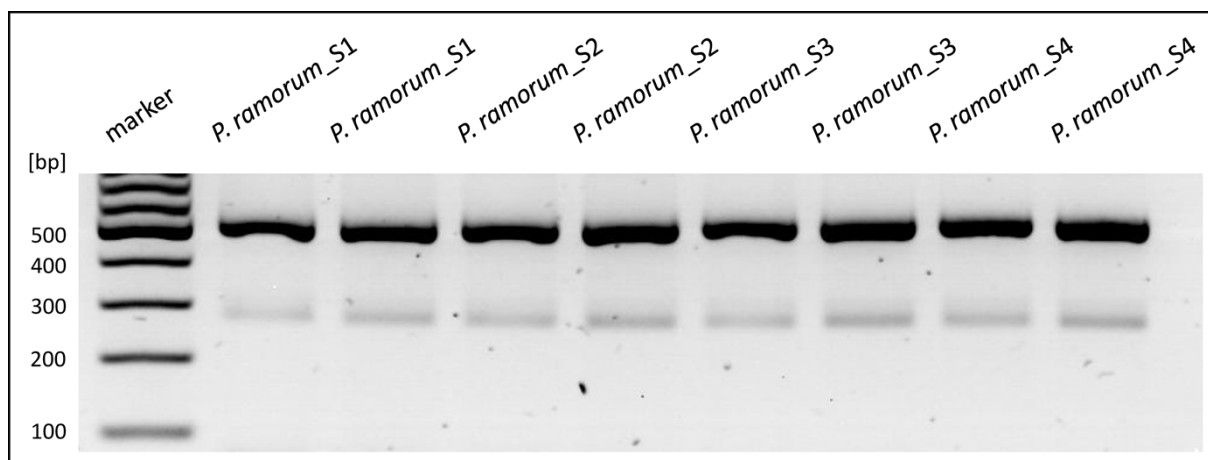

**Figure S1: Verification of the generated ssDNA on agarose gel.**

Agarose gel depicting the presence of single-stranded DNA (ssDNA) generated by LATE-PCR for *P. ramorum*.  
dsDNA = 450 bp fat band, ssDNA = 450 nt faint band
